# Supplementary material
Source: PubMed Central journal article supplement (PMC3207697)
Supplement: 1104264108_pnas.201104264SI.pdf [file 1104264108_pnas.201104264SI.pdf]

# Supporting Information

Nembrini et al. 10.1073/pnas.1104264108

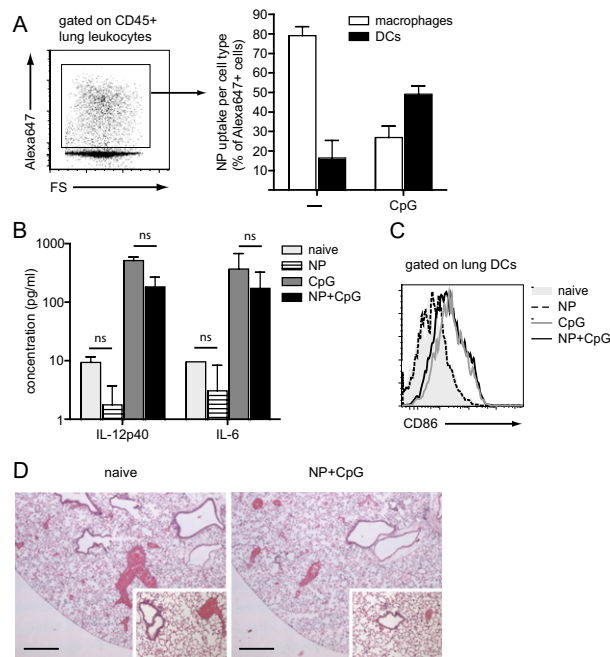

**Fig. S1.** Following pulmonary delivery, NPs are taken up by lung macrophages and DCs but do not induce inflammation. Alexa 647-labeled NPs (200 μg) were administered, with or without the addition of 2.5 μg CpG, in the lungs of C57BL/6 mice. (A) Uptake by lung macrophages and DCs was evaluated 24 h after delivery by flow cytometry. (B) Secretion of IL-12p40 and IL-6 in the BAL was determined by ELISA 24 h after the co-delivery of NPs and CpG. (C) Surface expression of CD86 by lung DCs at 24 h following pulmonary NP and CpG administration. (D) H&E staining on lung sections 30 d after co-delivery of NPs and 2.5 μg CpG. (Scale bar, 500 μm.) Results are presented as mean ± SD. Experiments were repeated two or three times with three mice per group.

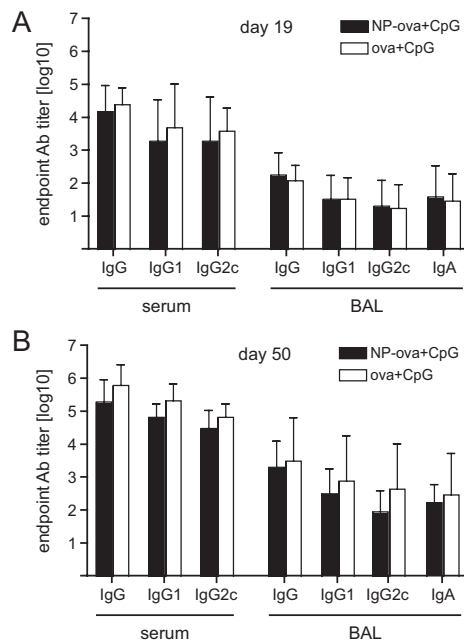

**Fig. S2.** Ova conjugation to NPs does not influence antigen-specific systemic and mucosal antibody responses. Mice were immunized as described in Fig. 1. Ova-specific antibody titers were determined on day 19 (A) and day 50 (B) in the serum and the BAL by ELISA. Results are presented as mean ± SD. Experiments were repeated with 10 mice per group.



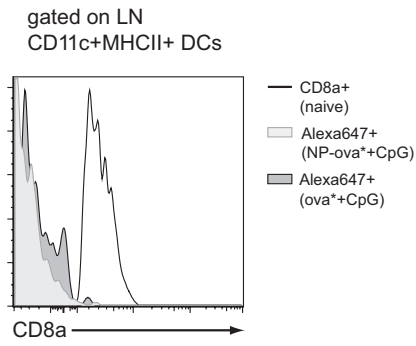

**Fig. S5.** Ova reaches the LN within DCs migrating from the lung. Twenty-four hours after delivery of NP-ova\* plus CpG or ova\* plus CpG, CD8a expression of LN Alexa 647<sup>+</sup> CD11c<sup>+</sup> MHC II<sup>+</sup> was analyzed. As a positive control, CD11c<sup>+</sup> MHCII<sup>+</sup> CD8a<sup>+</sup> DCs of a naive mouse LN are shown in the histogram overlay. Experiment was repeated two times with three mice per group.
